# Supplementary material for: A cascade enyne/ring closing metathesis approach to angularly fused dioxatriquinanes
Source: Royal Society of Chemistry journal article supplement (doi:10.1039/b409665g), 2004-01-01
Supplement: b409665g.doc [file b409665g.doc]

## Supporting Information


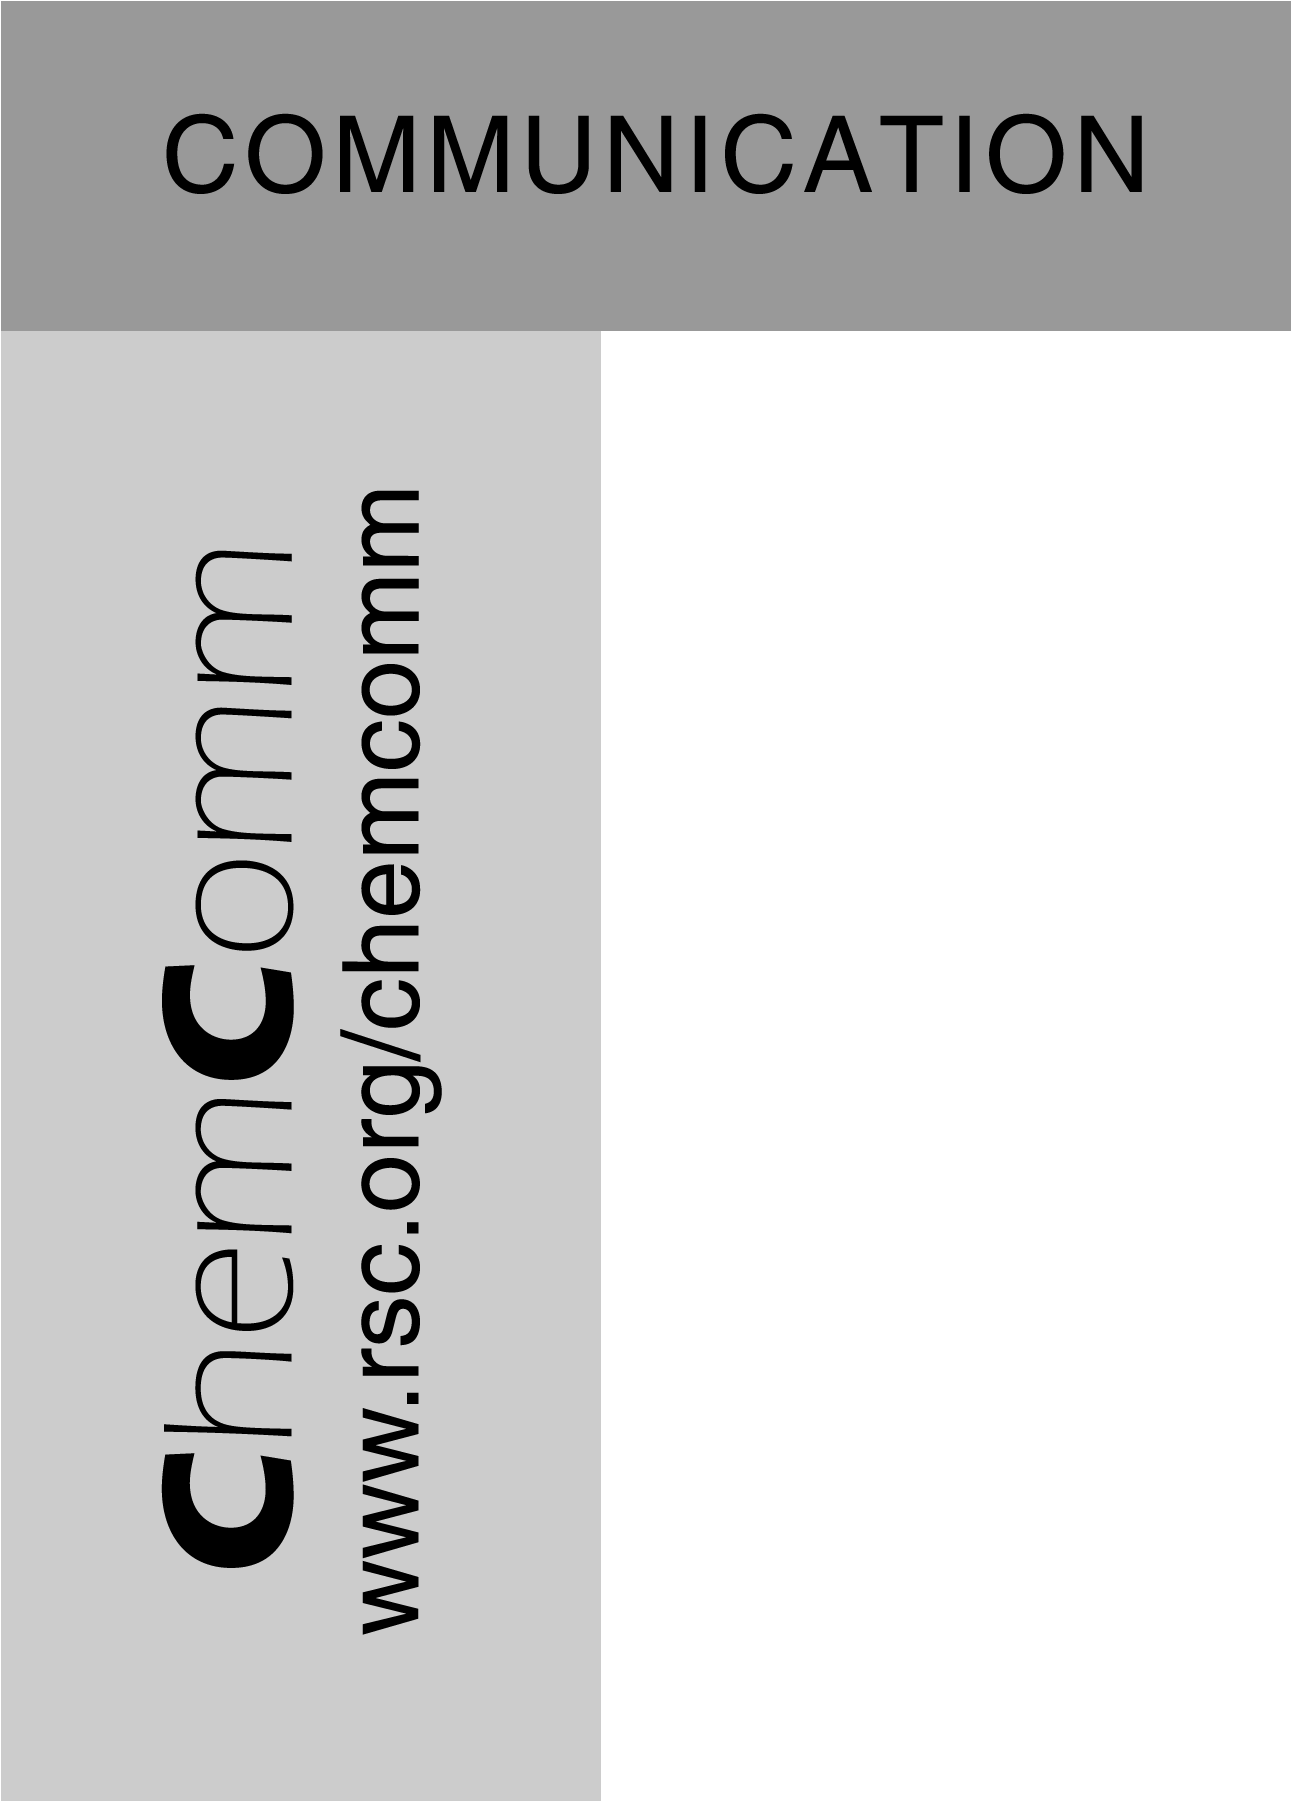
A cascade enyne/ring closing metathesis approach to angularly fused dioxatriquinanes

Krishna P. Kaliappan* and Rahul S. Nandurdikar

a Department of Chemistry, Indian Institute of Technology-Bombay, Powai, Mumbai – 400 076, India. Fax: 91 22 2572 3480; Tel: 91 22 2576 7177; E-mail: kpk@iitb.ac.in

**General Remarks:** Unless and otherwise noted, all starting materials and reagents were obtained from commercial suppliers and used further purification. Solvents used: Tetrahydrofuran was distilled from sodium benzophenone ketyl and toluene from sodium. Dichloromethane, hexanes and pyridine were freshly distilled from calcium hydride. DMF was distilled over calcium hydride and stored over Molecular Sieves 4 Ao. Solvents for routine isolation of products and chromatography were reagent grade and glass distilled. Reaction flasks were dried in oven at 100oC for 12 h before use. Air and moisture sensitive reactions were performed under an argon/UHP nitrogen atmosphere. Column chromatography was performed using silica gel (100-200 mesh, Acme) with indicated solvents. All reactions were monitored by thin-layer chromatography carried out on 0.25 mm E. Merck silica plates (60F-254) using UV light as visualizing agent and 7% ethanolic phosphomolybdic acid and heat as developing agents. Optical rotation was recorded on Jasco DIP-370 digital polarimeter. IR spectra were recorded from Thermo Nicolet Avater 320 FT-IR and Nicolete Impact 400 machine. Mass spectra were obtained with Waters Micromass-Q-Tof microTM (YA105) spectrometer. Elemental analysis was recorded on Thermo Finnigan Flash EA 1112. 1H and 13C NMR spectra were recorded either on Varian AS 400 or Varian ASM 300 instruments in CDCl3 solutions. 1H NMR data were reported in the order of chemical shift (δ in ppm), multiplicity (s, singlet; d, doublet; t, triplet; q, quartet; m, multiplet), number of protons, and coupling constant *J* in hertz (Hz).

**Preparation of compound 8:**

To a solution of TMS acetylene (1.3 ml, 9.68 mmol) in THF (15 ml) under argon at 0oC was added 1.6 M *n*BuLi in hexane (6.05 ml, 9.68 mmol). The reaction mixture was stirred at room temperature for 1h and then a THF (20 ml) solution of the ketone **7** (2.0 g, 7.75 mmol) was added dropwise at 0oC. After 2h at 0oC, a saturated ammonium chloride solution (20 ml) was added and the reaction mixture was extracted with hexanes. The combined organic layer was washed with water, brine and dried over anhydrous sodium sulphate. The organic phase was concentrated under *vacuo* and the residue waspurified by flash column chromatography using 9:1 hexane/ethyl acetate to afford alcohol **8** (2.2 g) in 80% yield.

R*f* = 0.59 (1:1 hexane/ethyl acetate); mp 116-117oC; [α ]25D +12.66 (*c* 1.0, CHCl3); IR (KBr) 3490, 2172, 1459, 1387, 1255, 1209, 1036, 858 cm-1; 1H NMR (CDCl3, 300 MHz) δ 0.20 (s, 9H), 1.38 (s, 6H), 1.46 (s, 3H), 1.59 (s, 3H), 3.02 (bs, 1H), 3.89 (d, 1H, *J* = 7.0 Hz), 4.03 (dd, 1H, *J* = 8.8, 5.5 Hz), 4.14 (dd, 1H, *J* = 8.8, 6.6 Hz), 4.38- 4.40 (m. 1H), 4.58 (d, 1H, *J* = 3.7 Hz), 5.82 (d, 1H, *J* = 3.7 Hz)**;** 13C NMR (CDCl3, 75 MHz) δ -0.2, 25.1, 26.7, 26.8, 26.8, 66.9, 74.8, 76.0, 81.5, 84.0, 94.4, 101.7, 104.3, 109.5, 113.8; Anal. calcd. for C17H28O6Si: C, 57.28; H, 7.92 found C, 57.145; H, 7.767; LRMS (EI) [M+Na]+ 379.2010.

**Preparation of compound 9:**

Sodium hydride (0.18 g, 4.5 mmol) was washed with 3 x 10 ml of dry hexane to remove the mineral oil coatings and DMF (21 ml) was added to this fine powder under argon followed by a DMF (7 ml) solution of alcohol **8** (1.06 g, 3 mmol)drop wise at 0oC over a period of 15 min. Then the resultant suspension was stirred at room temperature for 2h before quenching with allyl bromide (0.57 ml, 6.6 mmol). After 2h, the reaction was quenched with ammonium chloride solution (20 ml) and extracted with ethyl acetate. The combined organic phase was washed with excess water, brine and dried over anhydrous sodium sulphate. The residue thus obtained after evaporation under reduced pressure was purified by silica gel column chromatography (95:5 hexanes/ethyl acetate) to afford **9** (0.8 g, 78 %).

R*f* = 0.53 (5:1 hexane/ethyl acetate); mp 63-65oC; [α] 25D +44.99 (*c* 1.0, CHCl3); IR (KBr) 3246, 3094, 2991, 2951, 2900, 2116, 1652, 1398, 1158, 1057, 879, 746 cm-1; 1H NMR (CDCl3, 300 MHz) δ 1.35 (s, 3H), 1.36 (s, 3H), 1.44 (s, 3H), 1.57 (s, 3H), 2.70 (s, 1H), 4.09-4.20 (m, 4H), 4.33-4.43 (m, 2H), 4.60 (d, 1H, *J* = 3.7 Hz), 5.16 (ddd, 1H, *J* = 10.8, 3.3, 1.5 Hz), 5.34 (ddd, 1H, *J* = 17.1, 3.6, 1.8 Hz), 5.81 (d, 1H, *J* = 3.7 Hz), 5.90-6.03 (m, 1H); 13C NMR (CDCl3, 75 MHz) δ 25.4, 26.7, 26.9, 27.0, 66.1, 67.5, 74.6, 79.3, 79.4, 80.9, 81.3, 83.3, 104.3, 109.6, 113.7, 116.6, 134.4; LRMS (EI) [M+Na]+ 347.1474; HRMS (EI) calcd. for C17H24O6Na *m/z* 347.1471, found *m/z* 347.1474.

**Preparation of compound 10:**

10 ml of 60% AcOH in water was added to the enyne **9** (0.6 g, 1.85 mmol) and the mixture was stirred for 18 h. Then toluene (3 x 20 ml) was successively added and evaporated under *vacuo* to remove traces of water and acetic acid. The crude diol was used in the next step without further purification.

To a refluxing solution of the crude diol (0.58 g), imidazole (0.55 g, 8.16 mmol) and triphenylphosphine (2.14 g, 8.16 mmol) in dry toluene, iodine (1.55 g, 6.13 mmol) was added portion wise through the condenser. The reaction mixture was further refluxed for 5 h and cooled to RT. The organic layer was washed with saturated sodium thiosulphate solution (3 x 10 ml), water, brine and dried over anhydrous sodium sulphate. Removal of the solvent followed by purification by column chromatography (49:1 hexane/ ethyl acetate) yielded **10** (0.39 g)in 85% yield (for two steps).

# R*f* = 0.57 (9:1 hexane/ethyl acetate); [α]25D +31.30 (*c* 1.15, CHCl3); IR (film) 3290, 3083, 2109, 1642, 1046 cm-1 1H NMR (CDCl3, 300 MHz) δ 1.36 (s, 3H), 1.59 (s, 3H), 2.66 (s, 1H), 4.16 (ddt, 1H, *J* = 7.3, 3.0, 1.5 Hz), 4.31 (ddt, 1H, *J* = 7.0, 3.0, 1.5 Hz), 4.49 (d, *J* = 6.6 Hz), 4.64 (d, 1H, *J* = 3.7 Hz), 5.18 (ddd, 1H, *J* = 10.3, 3.0, 1.5 Hz), 5.28- 5.39 (m, 2H), 5.49 (ddd, 1H, *J* = 14.3, 2.6, 1.3 Hz), 5.86 (d, 1H, *J* = 3.7 Hz), 5.83- 6.05 (m, 2H); 13C NMR (CDCl3, 75 MHz) δ 26.8, 26.8, 67.8, 78.6, 79.2, 81.7, 82.2, 82.6, 104.2, 113.6, 117.3, 120.3, 132.4, 134.4; LRMS (EI) [M+Na]+ 273.1250; HRMS (EI) calcd. for C17H24O6Na *m/z* 273.1103, found *m/z* 273.1100.

**Preparation of compound 15 and 16:**

To a solution of dienyne diacetonide **10** (0.7 g, 2.8 mmol) in dry methanol (30 ml) was slowly added Conc. HCl (4 ml) and stirred at room temperature for 36 h. Then solid sodium bicarbonate was added to neutralize the acid, filtered. The residual solid was washed with ethyl acetate. The organic solvent was evaporated under reduced pressure. The crude product was purified by column chromatography using 93:7 hexane/ ethyl acetate to afford a mixture of anomeric alcohols **15** (0.15 g, 24%) and **16** (0.41 g, 65%).

*α-anomer* **(major product) 16** R*f* = 0.3 (4:1 hexane/ethyl acetate); [α]25D +147.27 (*c* 1.10, CHCl3);IR (film) 3467, 3296, 3092, 2993, 2118, 1645, 1124, 1045, 928 cm-1; 1H NMR (CDCl3, 300 MHz) δ 2.74 (s, 1H), 3.47 (s, 3H), 4.14 (d, 1H, *J* = 2.6 Hz), 4.23 (d, 2H, *J* = 5.5Hz), 4.52 (d, 1H, *J* = 6.9 Hz), 4.89 (d, 1H, *J* = 2.6 Hz), 5.23 (dd, 1H, *J* = 10.2, 1.5 Hz), 5.31- 5.37 (m, 2H), 5.44 (dd, 1H, *J* = 17.1, 1.5 Hz), 5.91- 6.08 (m, 2H); 13C NMR (CDCl3, 75 MHz) δ 56.3, 67.2, 78.2, 79.2, 80.4, 80.6, 84.3, 109.0, 117.9, 118.9, 133.8, 134.9; HRMS (EI) calcd. for C12H16O4Na *m/z* 247.0946, found *m/z* 247.0935.

***β-anomer* (minor product) 15** R*f* = 0.24 (4:1 hexane/ethyl acetate); [α]25D –20.59 (*c* 1.02, CHCl3)**;** IR (film) 3353, 3296, 3092, 2105, 1650, 1144, 1030, 933 cm-1; 1H NMR (CDCl3, 300 MHz) δ 2.66 (s, 1H), 3.50 (s, 3H), 4.24- 4.29 (m, 3H), 4.47 (d, 1H, *J* = 7.3 Hz), 5.04 (d, 1H, *J* = 4.8 Hz), 5.15- 5.20 (m, 1H), 5.30- 5.45 (m, 3H), 5.89- 6.04 (m, 2H); 13C NMR (CDCl3, 75 MHz) δ 55.9, 67.4, 77.6, 78.0, 79.9, 80.3, 83.6, 101.9, 116.9, 119.1, 134.1, 134.4; HRMS (EI) calcd. for C12H16O4Na *m/z* 247.0946, found *m/z* 247.0943.

**Preparation of compound 17:**

Acetic anhydride (3 ml) and a catalytic amount of DMAP were added to alcohol **16** (0.24 g, 1.07 mmol) in pyridine (3 ml) at RT. After 8h at RT, toluene (10 ml x 3) was successively added and removed under reduced pressure. The crude residue was chromatographically purified using 95:5 hexane/ ethyl acetate as eluent. The acetate **17** was obtained (0.255 g, 90%) as colorless oil.

R*f* = 0.59 (2:1 hexanes/ethyl acetate); [α]25D –23.58 (*c* 1.06, CHCl3)**;** IR (film) 3310, 2258, 1743, 1641, 1231, 919cm-1; 1HNMR (CDCl3, 300 MHz) δ 2.14 (s, 3H), 2.74 (s, 1H), 3.45 (s, 3H), 3.98 (ddt, 1H, *J* = 7.2, 3.0, 1.5 Hz), 4.25 (ddt, 1H, *J* = 6.6, 3.0, 1.5 Hz), 4.46 (d, 1H, *J* = 6.9 Hz), 4.93 (d, 1H, *J* = 1.5 Hz), 5.14 (ddd, 1H, *J* = 10.8, 3.0, 1.5 Hz), 5.27 (ddd, 1H, *J* = 17.7, 3.6, 1.8 Hz), 5.32 (d, 1H, *J* = 1.5 Hz), 5.36 (ddd, 1H, *J* = 10.2, 2.4, 1.5 Hz), 5.46 (ddd, 1H, *J* = 17.1, 2.4, 1.5 Hz), 5.80- 5.91 (m, 1H), 6.00- 6.12 (m, 1H); 13C NMR (CDCl3, 75 MHz) δ 20.9, 56.0, 67.9, 78.0, 78.7, 79.4, 79.7, 85.1, 107.3, 116.8, 119.5, 134.2, 169.4; HRMS (EI) calcd. for C14H18O5Na *m/z* 289.1052, found *m/z* 289.1053 .

**General procedure for tandem enyne-RCM reaction:**

A 1 mmol portion of dienyne was dissolved in 325 ml of dry dichloromethane under argon/ ethylene and the solution was degassed. To this was added a dichloromethane solution of Grubb’s catalyst (10 mol % of **13** or 5 mol % of **14**). The reaction mixture was refluxed for 12 to 36h as mentioned in the table. The reaction mixture was cooled to room temperature and DMSO (50 equiv. to catalyst) was added and stirred for 6 h. Evaporation of the solvent and purification by column chromatography yielded the corresponding product/s.

**Enyne products**

# R*f* = 0.23 (9:1 hexane/ethyl acetate); [α]25D –27.18 (*c* 1.03, CHCl3); IR (film) 3085, 2987, 2934, 2854, 1643, 1382, 1374, 1088, 1031 cm-1; 1H NMR (CDCl3, 300 MHz) δ 1.36 (s, 3H), 1.65 (s, 3H), 4.34 (d, 1H, *J* = 3.7 Hz), 4.64- 4.7 (m, 3H), 5.22 (d, 2H, *J* = 10.6 Hz,), 5.42 (d, 1H, *J* = 17.2 Hz), 5.58 (dd, 1H, *J* = 17.4, 0.9 Hz), 5.69- 5.78 (m, 1H), 5.81 (d, 1H, *J* = 3.7 Hz), 6.08- 6.19 (m, 2H); 13C NMR (CDCl3, 75 MHz) δ 26.3, 26.8, 75.0, 81.5, 82.4, 96.3, 103.8, 112.8, 118.7, 119.0, 124.9, 127.7, 132.2, 138.4; HRMS (EI) calcd. for C17H24O6Na *m/z* 273.1103, found *m/z* 273.1100.

R*f*= 0.48 (2:1 hexane/ethyl acetate); [α]25D –60.82 (*c* 1.15, CHCl3)**;** IR (film) 3085, 2926, 2851, 1745, 1234, 1071, 1017 cm-1; 1HNMR (CDCl3, 300 MHz) δ 2.13 (s, 3H), 3.55 (s, 3H), 4.32 (d, 1H, *J* = 6.9 Hz), 4.45 (ddd, 1H, *J* = 13.8, 1.8, 0.9 Hz), 4.58 (ddd, 1H, *J* = 13.8, 1.8, 1.2 Hz), 4.97 (d, 1H, *J* = 3.9 Hz), 5.02 (d, 1H, *J* = 3.9 Hz), 5.19- 5.24 (m, 2H), 5.37 (ddd, 1H, *J* = 17.1, 3.0, 1.5 Hz), 5.62 (dd, 1H, *J* = 18.0, 0.6 Hz), 5.83 (ddd, 1H, *J* = 17.4, 10.5, 6.9 Hz), 6.01 (bs, 1H), 6.35 (ddd, 1H, *J* = 18.0, 11.4, 1.2 Hz); 13C NMR (CDCl3, 75 MHz) δ 20.7, 57.0, 74.8, 79.0, 85.1, 93.2, 107.1, 117.7, 118.7, 125.1, 128.3, 133.1, 138.7, 169.9; LRMS (EI) [M+Na]+ 289.1233; HRMS (EI) calcd. for C14H18O5Na *m/z* 289.1052, found *m/z* 289.1064.

**Tandem enyne - RCM product**

R*f*= 0.32 (2:1 hexane/ethyl acetate); [α]25D –109.31 (*c* 1.15, CHCl3);IR (film) 3079, 2933, 1742, 1377, 1242, 1110, 1024 cm-1; 1HNMR (CDCl3, 300 MHz) δ 2.16 (s, 3H), 3.37 (s, 3H), 4.80 (dd, 1H, *J* = 13.5, 2.6 Hz), 4.90 (dd, 1H, *J* = 13.5, 0.7 Hz), 5.03 (bs, 1H), 5.11- 5.15 (m, 2H), 5.62 (dd, *J* = 2.1, 1.8 Hz), 6.11 (dd, 1H, *J* = 6.6, 1.5 Hz), 6.31 (dd, 1H, *J* = 6.6, 0.9 Hz); 13C NMR (CDCl3, 75 MHz) δ 20.8, 55.2, 81.2, 83.0, 87.4, 102.8, 109.8, 115.4, 126.4, 141.4, 146.3, 170.2; LRMS (EI) [M+Na]+ 262.2724; HRMS (EI) calcd. for C12H14O5Na *m/z* 261.0739, found *m/z* 261.0734.
